# Supplementary material
Source: publisher site journal article supplement (https://www.dovepress.com/article/271882)
Supplement: Supplementary file 1 [file get_supplementary_file.php]

**A non-invasive prediction model for non-alcoholic fatty liver disease in adults with type 2 diabetes: based on the population of northern Urumqi, China**

Mingyue Xue1,2, Xiaoping Yang3, Yuan Zou3, Tao Liu3, Yinxia Su3, Cheng Li4, Hua Yao3*, Shuxia Wang3*

Affiliations:

1 College of Public Health, Xinjiang Medical University, Urumqi, Xinjiang 830011, China

2 Hospital of traditional Chinese medicine affiliated to the fourth clinical medical college of Xinjiang medical university, Urumqi 830011, China

3 Health management institute, Xinjiang medical university, Urumqi 830011, China

4 The first affiliated hospital of Xinjiang medical university, Urumqi 830011, China

*Correspondence should be addressed to:

Hua Yao, PhD

yaohua01@sina.com

Shuxia Wang

2724443591@qq.com

**Table S1.** Multivariate logistic regression analysis for risk factors associated NAFLD in T2DM in the development group for males and females

| Intercept and Variable | Female | | | Male | | |
| --- | --- | --- | --- | --- | --- | --- |
| Odds Ratio | 95% CI | P value | Odds Ratio | 95% CI | P value |
| Age(years), n(%) |  |  |  |  |  |  |
| 18-29 | 1 | Ref | — | 1 | Ref | — |
| 30-39 | 1.722 | 0.852-3.685 | 0.144 | 1.631 | 0.836-3.301 | 0.158 |
| 40-49 | 2.070 | 1.080-4.244 | 0.036 | 2.305 | 1.249-4.484 | 0.010 |
| 50-59 | 2.163 | 1.141-4.396 | 0.024 | 1.521 | 0.829-2.947 | 0.193 |
| 60-69 | 1.709 | 0.903-3.467 | 0.116 | 1.505 | 0.822-2.909 | 0.203 |
| 70-79 | 1.303 | 0.688-2.644 | 0.439 | 1.222 | 0.666-2.365 | 0.534 |
| ≥ 80 | 0.884 | 0.462-1.808 | 0.721 | 1.062 | 0.573-2.072 | 0.854 |
| Ethnicity, n(%) |  |  |  |  |  |  |
| Han | 1 | Ref | — | 1 | Ref | — |
| Uygur | 0.519 | 0.458-0.589 | <0.001 | 0.672 | 0.582-0.774 | <0.001 |
| Kazak | 0.648 | 0.473-0.883 | 0.006 | 0.531 | 0.365-0.764 | <0.001 |
| Hui | 0.933 | 0.835-1.043 | 0.222 | 0.930 | 0.821-1.052 | 0.249 |
| Mongolian | 0.958 | 0.353-2.496 | 0.931 | 1.212 | 0.473-2.980 | 0.679 |
| other nationalities | 0.727 | 0.502-1.043 | 0.087 | 0.799 | 0.518-1.211 | 0.299 |
| Exercise |  |  |  |  |  |  |
| No | 1 | Ref | — | 1 | Ref | — |
| Yes | 0.599 | 0.556-0.645 | <0.001 | 0.570 | 0.520-0.624 | <0.001 |
| Smoking, n(%) | — | — | — |  |  |  |
| Non |  |  |  | 1 | Ref | — |
| Ever |  |  |  | 1.478 | 1.226-1.779 | <0.001 |
| Current |  |  |  | 1.729 | 1.542-1.938 | <0.001 |
| Dietary ratio, n(%) |  |  |  |  |  |  |
| Vegetarian based | 1 | Ref | — | 1 | Ref | — |
| Meat balanced | 0.913 | 0.780-1.068 | 0.253 | 0.947 | 0.738-1.220 | 0.669 |
| Meat based | 2.104 | 1.744-2.542 | <0.001 | 2.396 | 1.819-3.168 | <0.001 |
| Heart rate (counts per minute) | 1.009 | 1.006-1.010 | <0.001 | 1.006 | 1.002-1.010 | 0.004 |
| SBP (mmHg) | 1.008 | 1.006-1.010 | <0.001 | 1.007 | 1.005-1.010 | <0.001 |
| BMI (kg/m2) | 1.159 | 1.144-1.175 | <0.001 | 1.245 | 1.222-1.269 | <0.001 |
| Waist circumference (cm) | 1.023 | 1.019-1.028 | <0.001 | 1.015 | 1.009-1.022 | <0.001 |
| ASCVD, n(%) |  |  |  |  |  |  |
| No | 1 | Ref | — | 1 | Ref | — |
| Yes | 2.276 | 2.083-2.487 | <0.001 | 1.749 | 1.561-1.961 | <0.001 |
| Eye disease, n(%) |  |  |  | — | — | — |
| No | 1 | Ref | — |  |  |  |
| Yes | 3.875 | 3.103-4.875 | <0.001 |  |  |  |


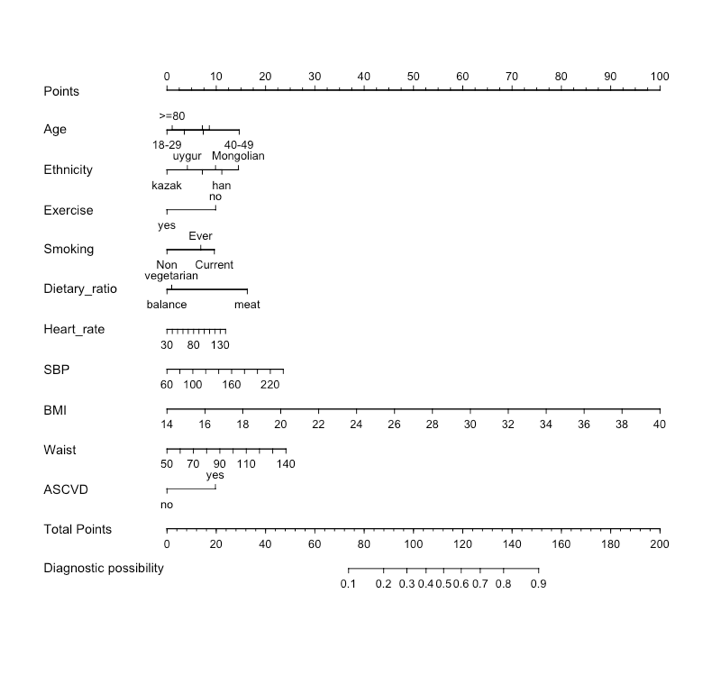

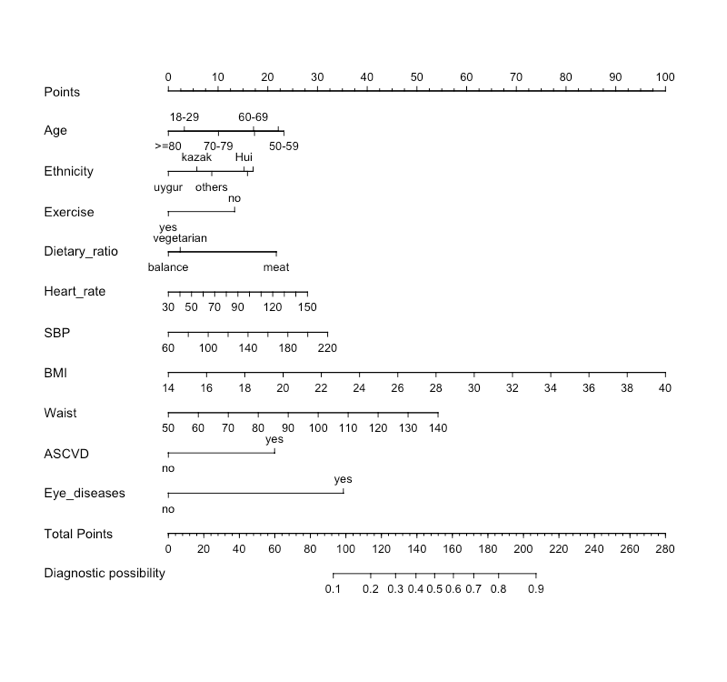


**S1a S2b**

**Fig. S1** Nomogram to predict the risk of T2DM for **S1a.** males and **S2b.** females.


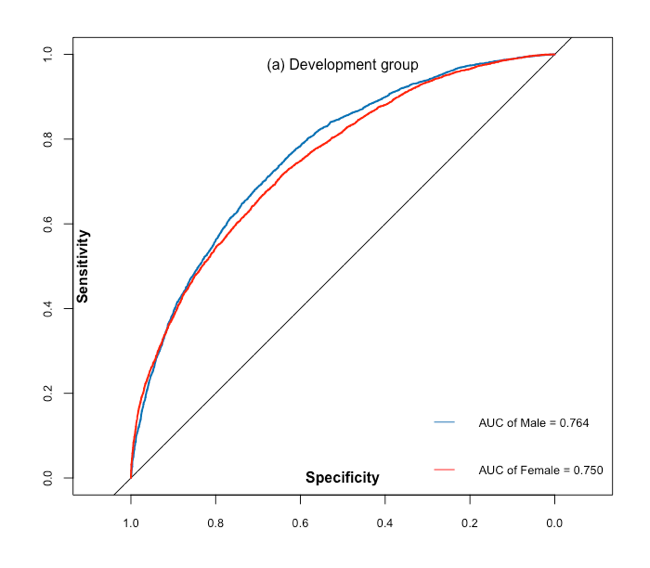
 **
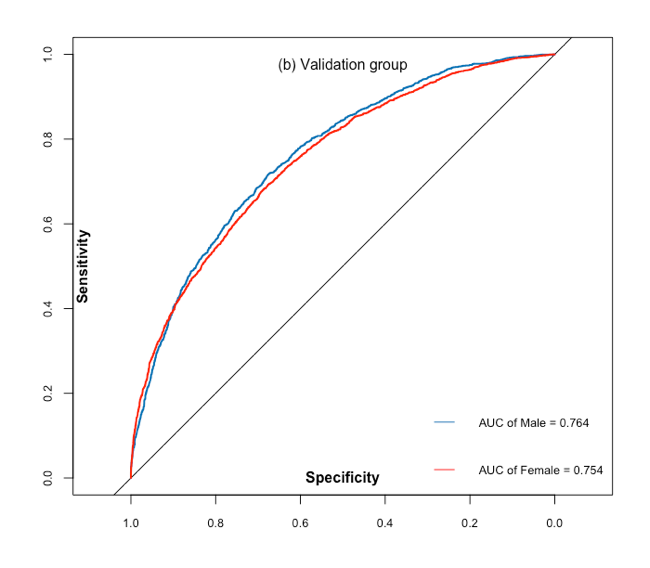
**

**S2a S2b**

**Fig. S2** The ROC curves of the nomogram for T2DM risk in the **S2a.** Development group and **S2b.** Validation group for males and females
